# Supplementary material for: Tdrd6a Regulates the Aggregation of Buc into Functional Subcellular Compartments that Drive Germ Cell Specification
Source: PubMed Central journal article supplement — Dev Cell. 2018 Aug 6;46(3):285–301.e9. doi: 10.1016/j.devcel.2018.07.009 (PMC6084408; doi:10.1016/j.devcel.2018.07.009), 2018-08-06
Supplement: mmc1.pdf [file mmc1.pdf]

**Developmental Cell, Volume 46**

**Supplemental Information**

**Tdrd6a Regulates the Aggregation of Buc  
into Functional Subcellular Compartments  
that Drive Germ Cell Specification**

**Elke F. Roovers, Lucas J.T. Kaaij, Stefan Redl, Alfred W. Bronkhorst, Kay Wiebrands, António M. de Jesus Domingues, Hsin-Yi Huang, Chung-Ting Han, Stephan Riemer, Roland Dosch, Willi Salvenmoser, Dominic Grün, Falk Butter, Alexander van Oudenaarden, and René F. Ketting**

# Supplemental Figure 1

A

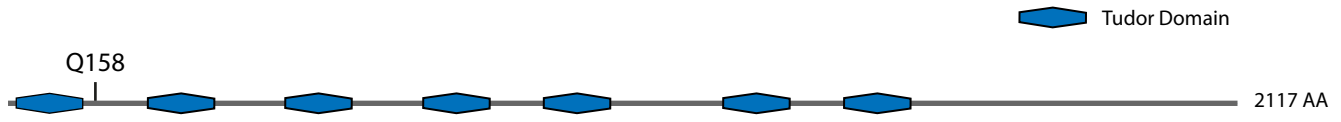

B

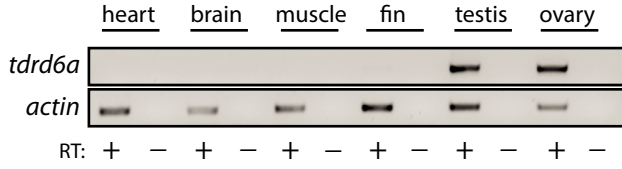

D

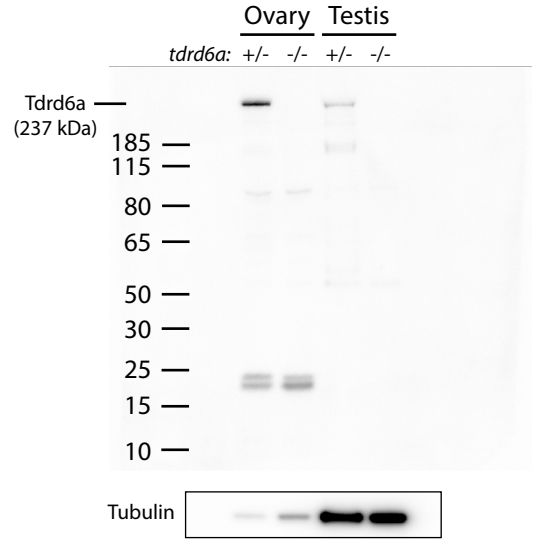

C

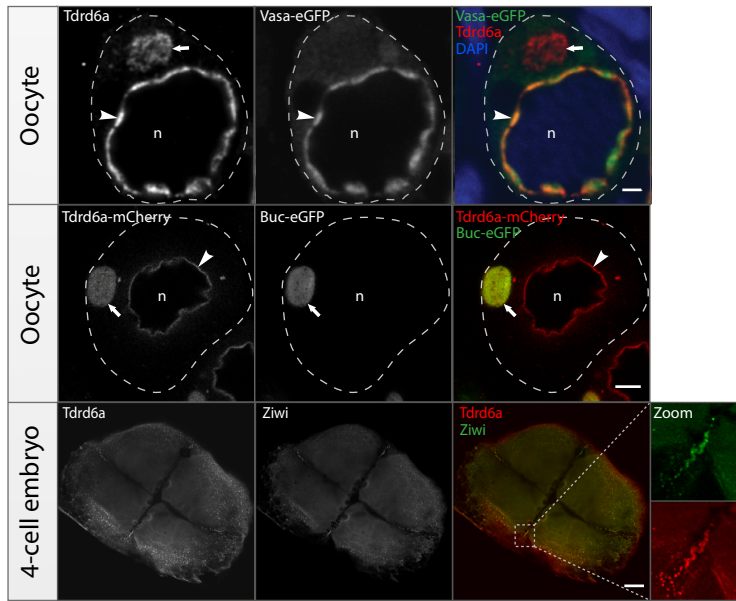

E

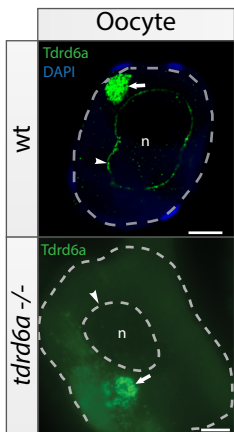

F

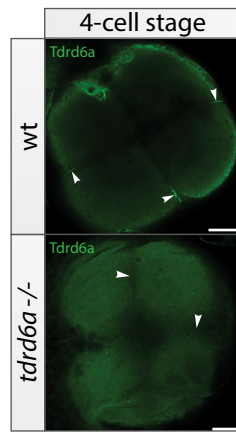

# Supplemental Figure 2

A

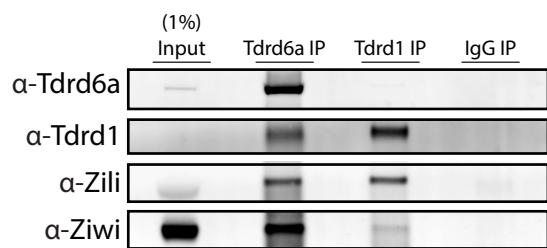

B

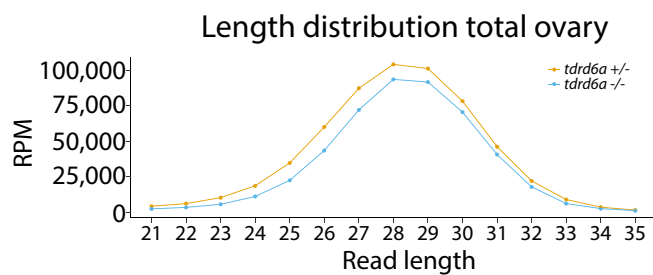

C

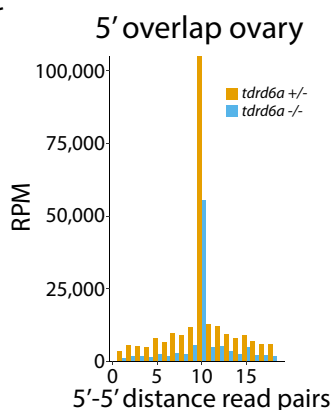

D

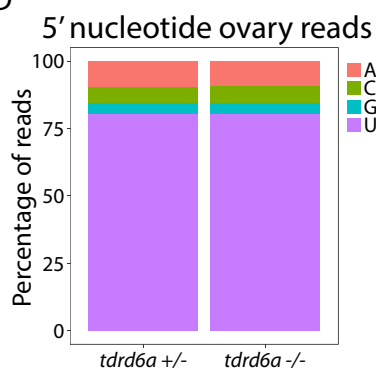

E

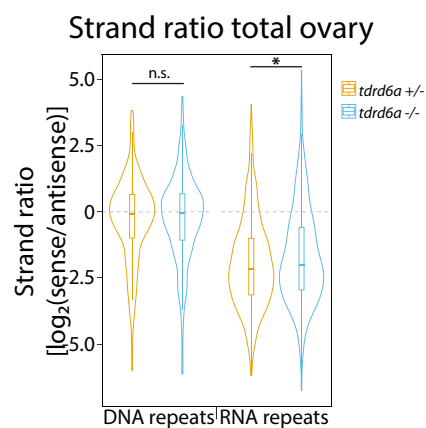

F

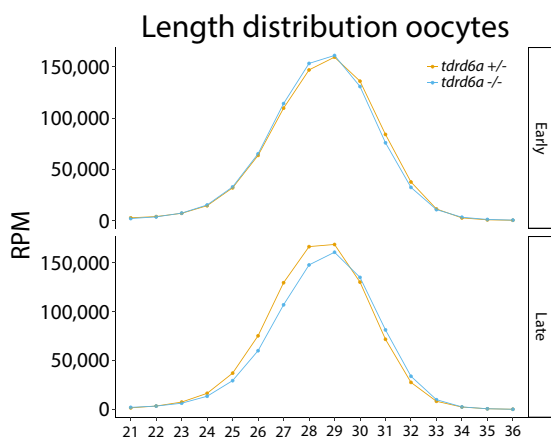

G

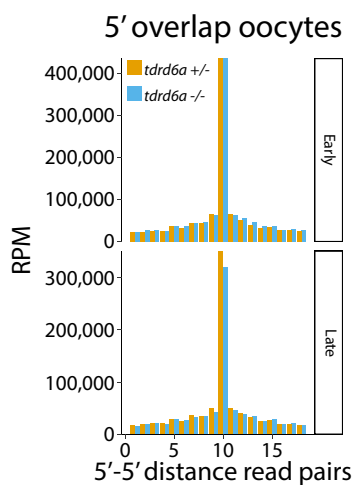

H

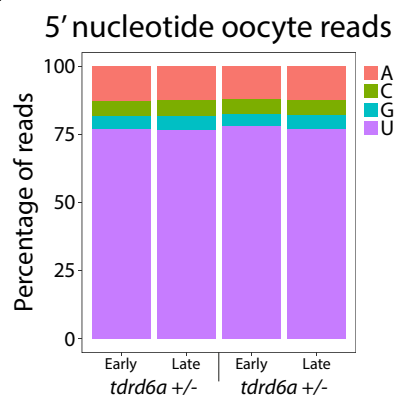

I

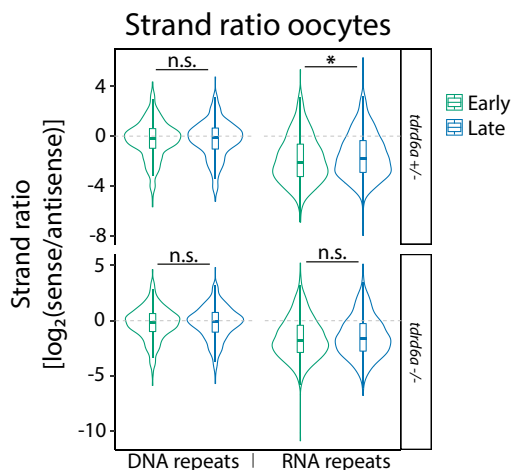

J

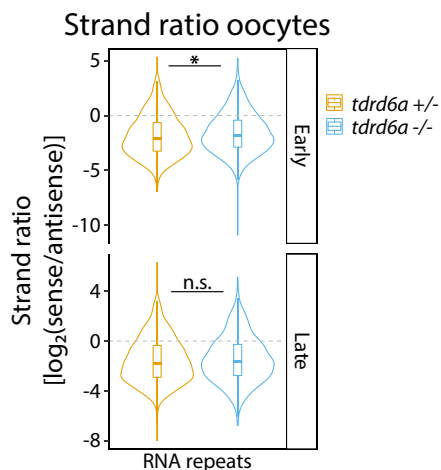

Supplemental Figure 3

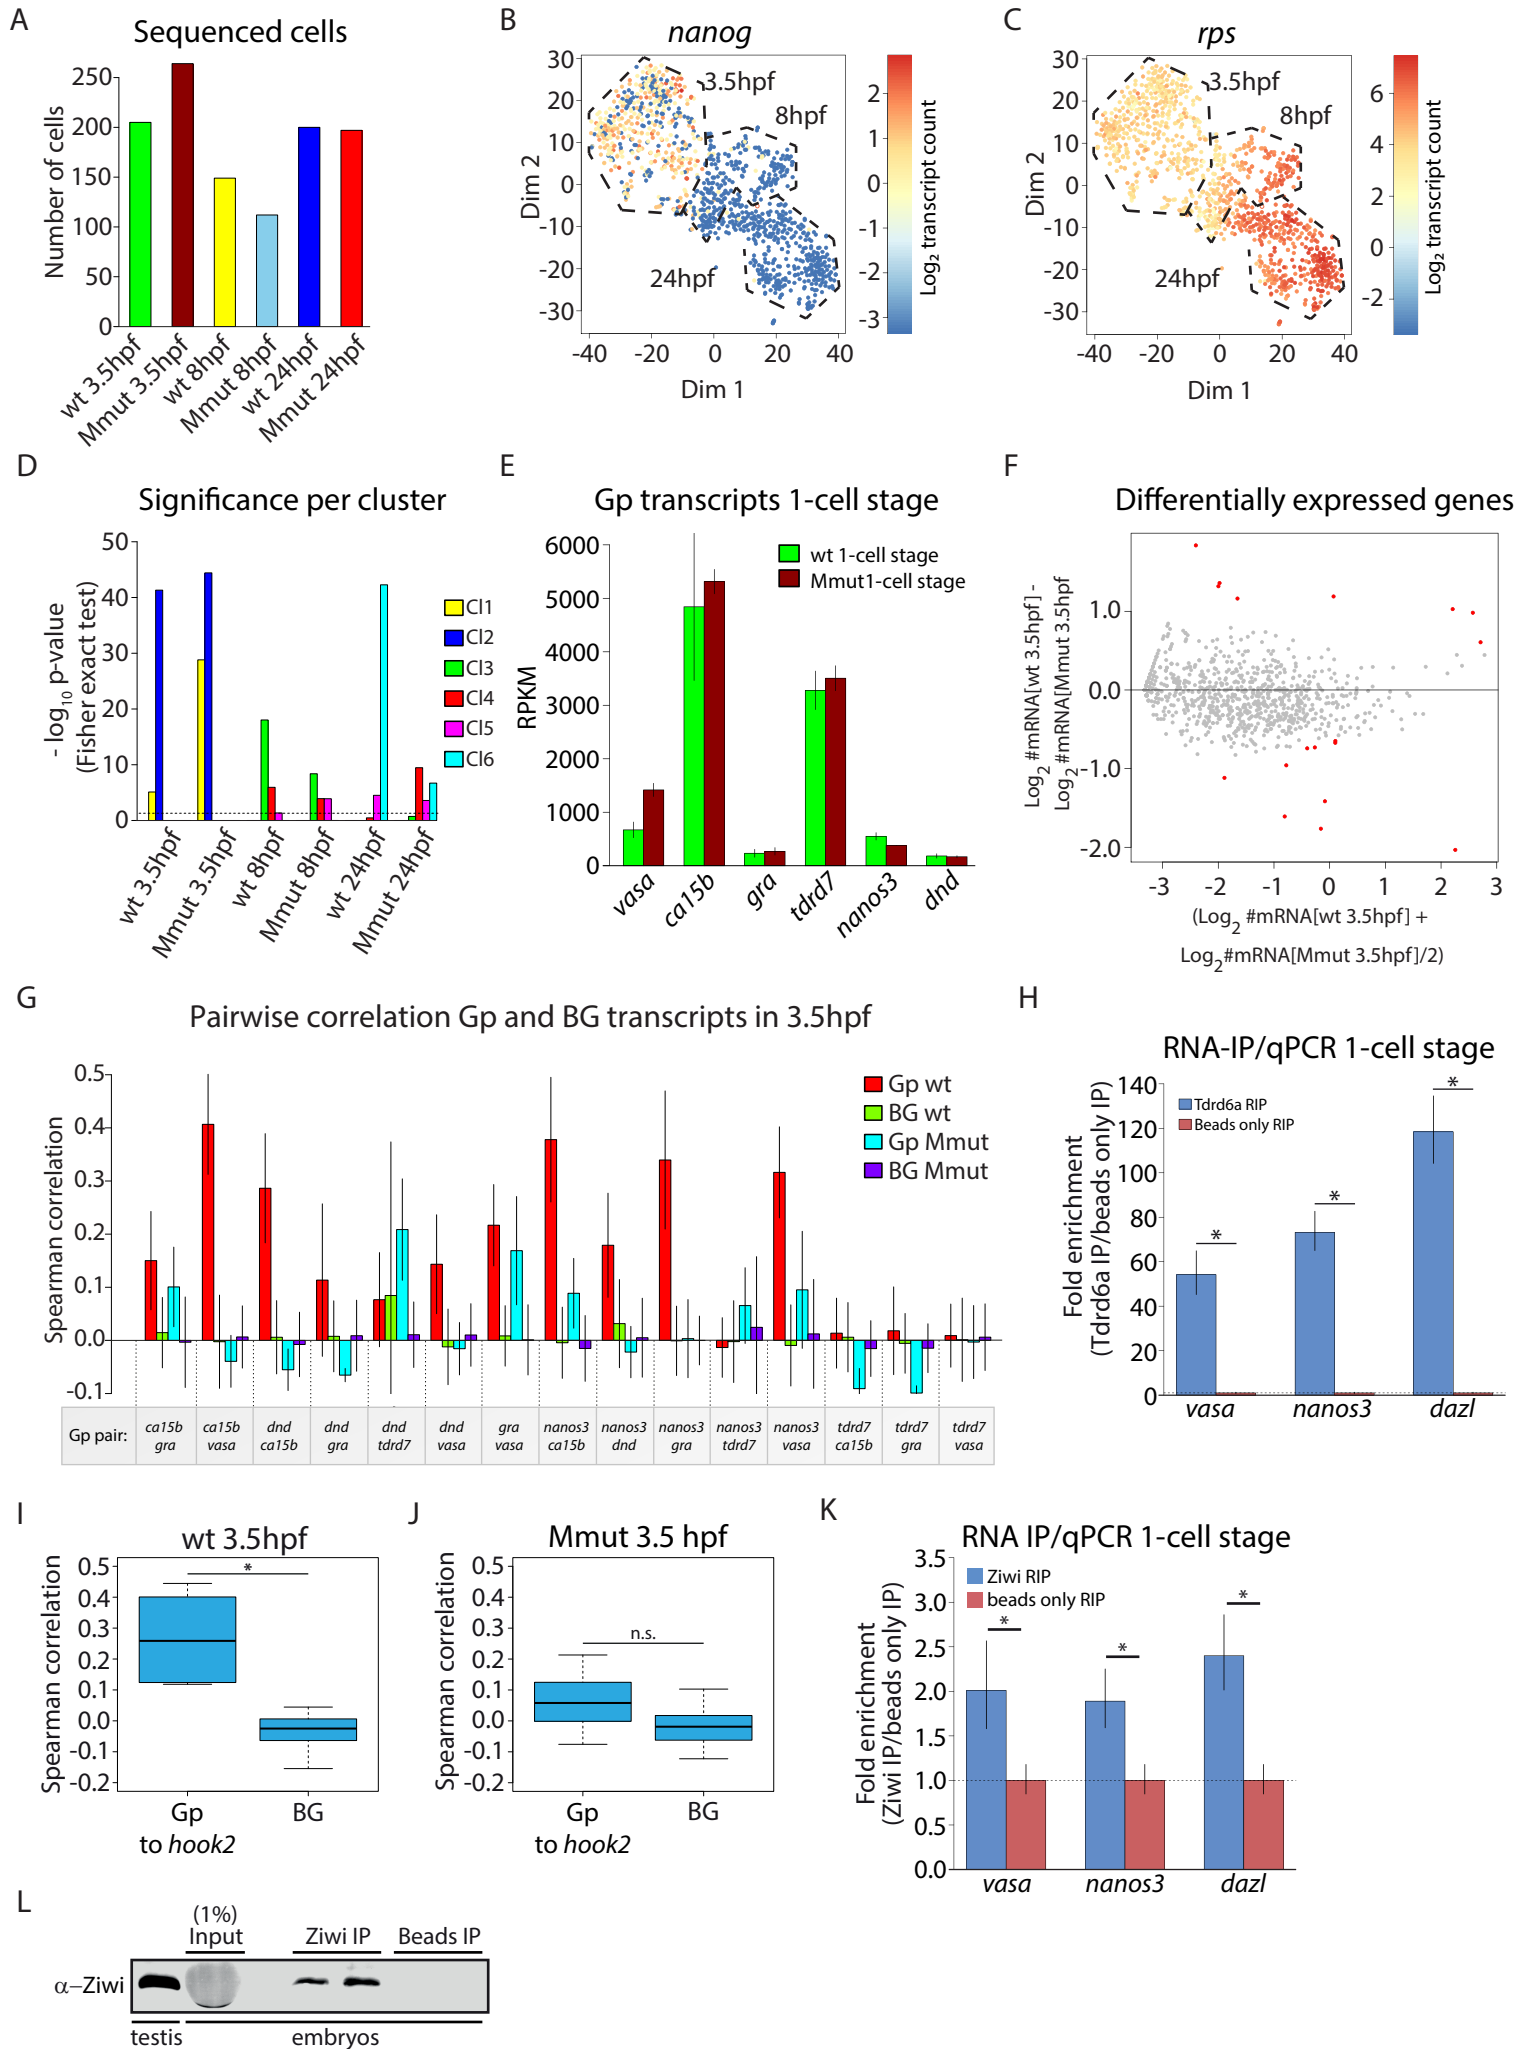

Supplemental Figure 4

A

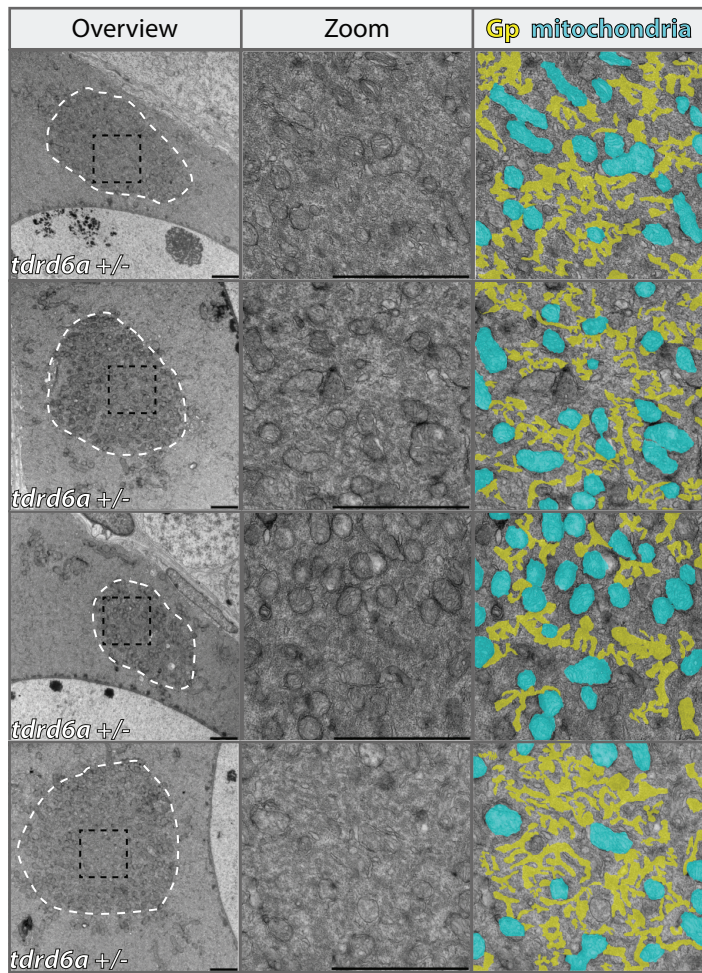

B

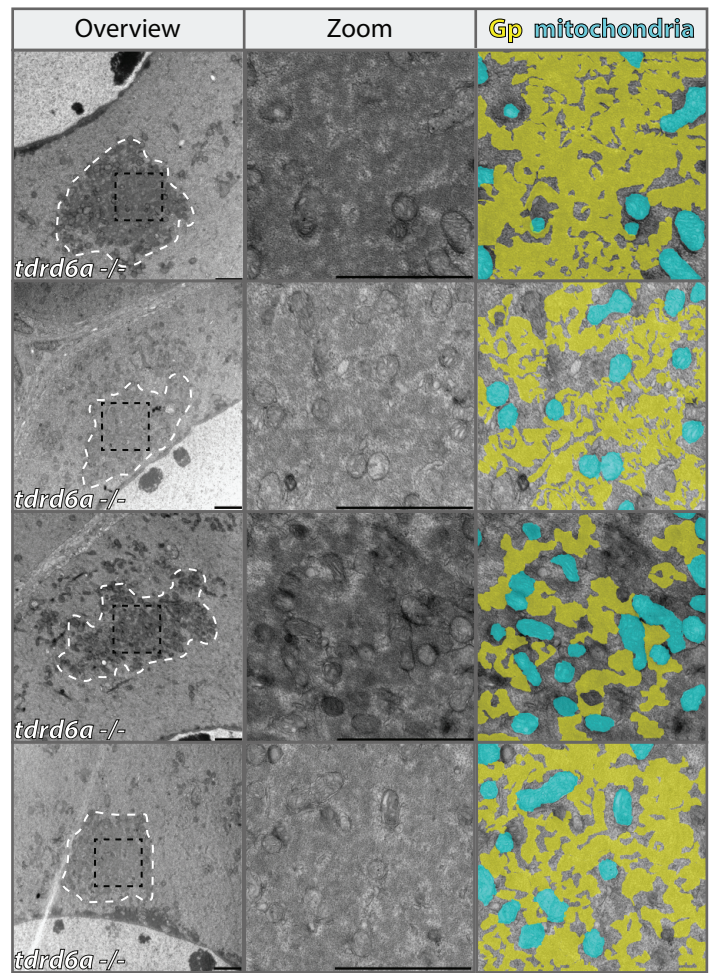

Supplemental Figure 5

A

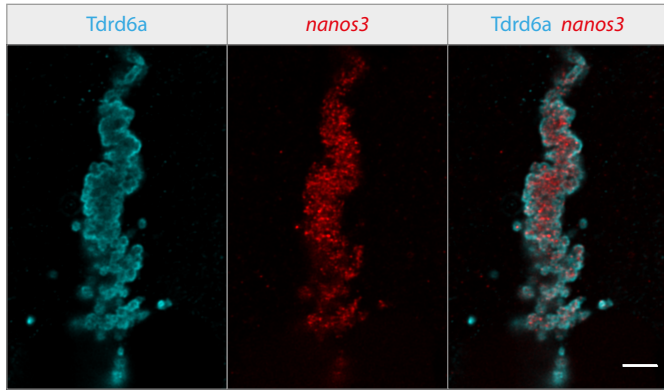

B

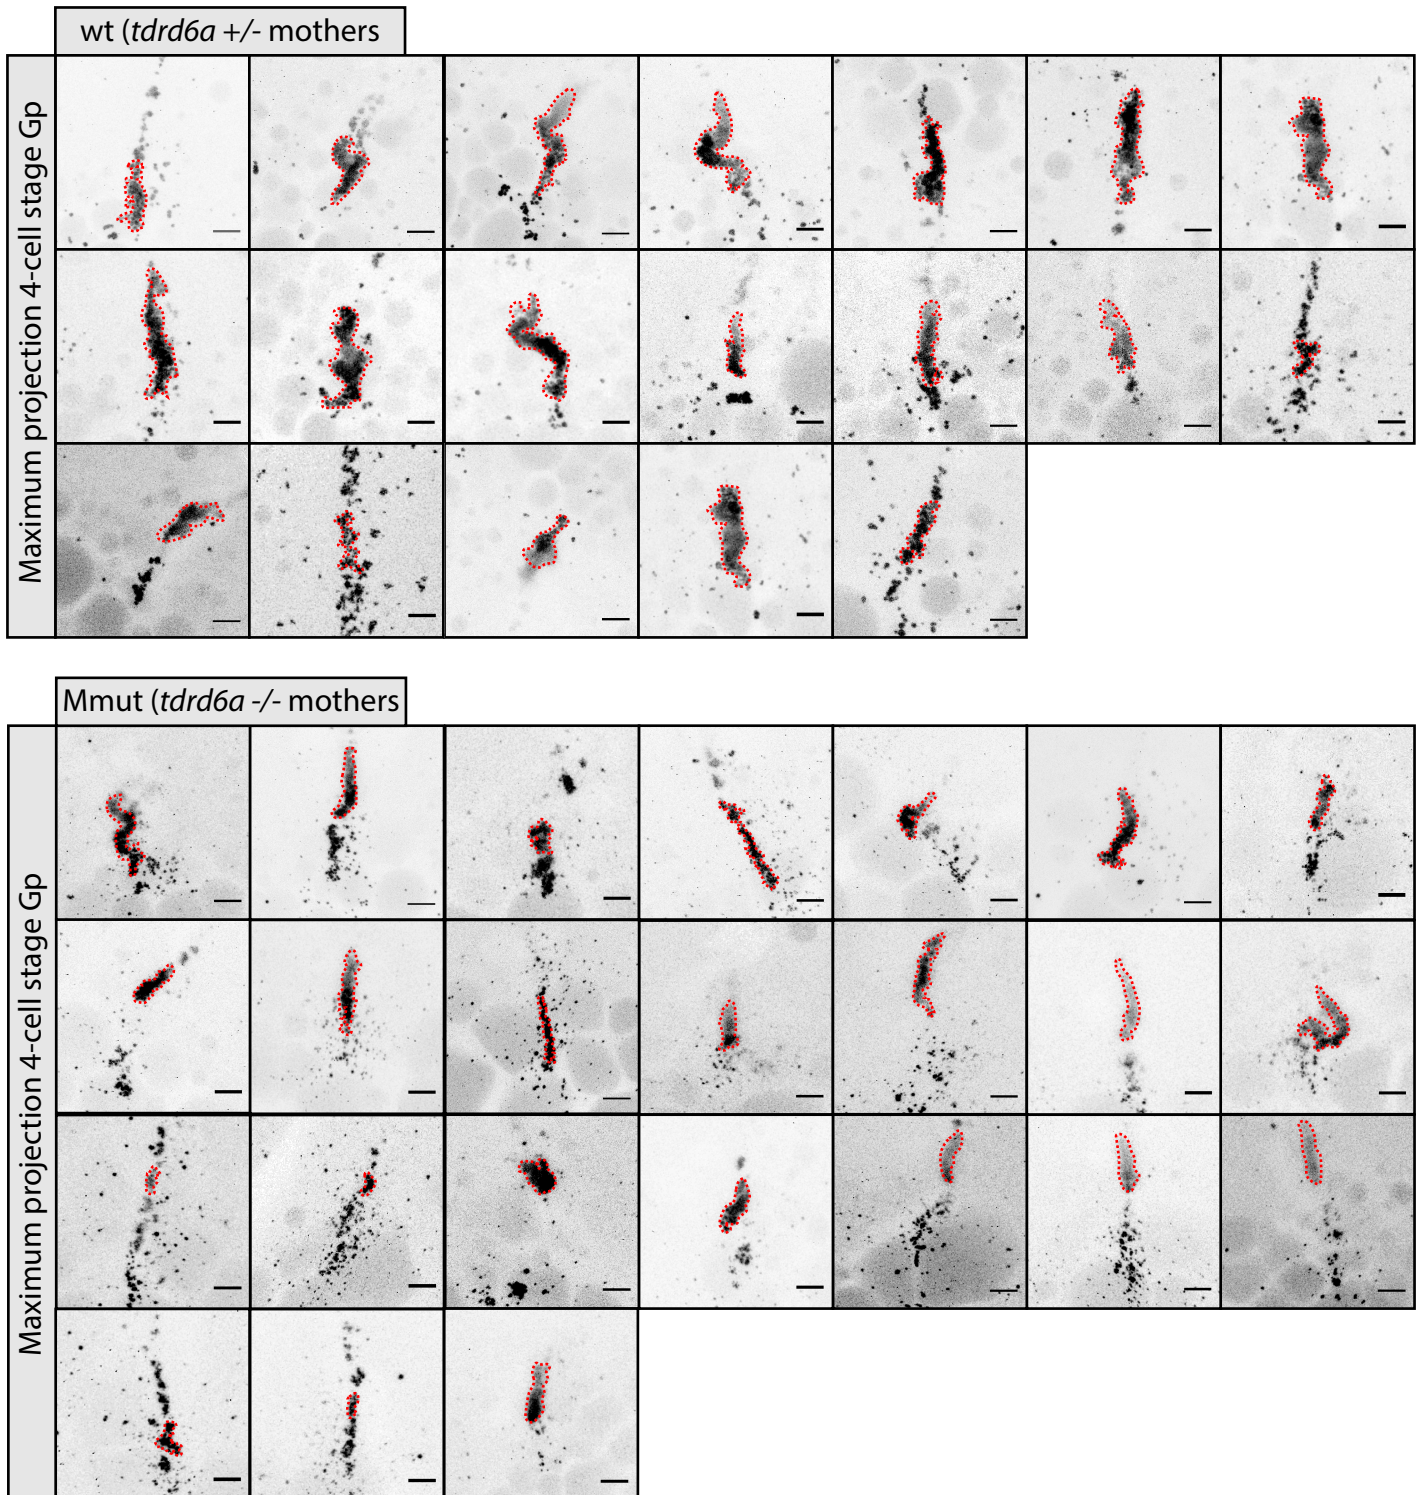

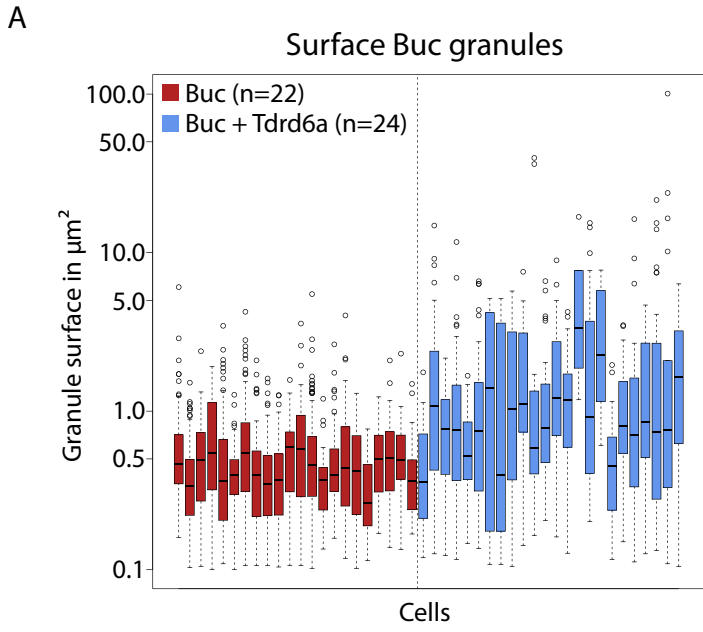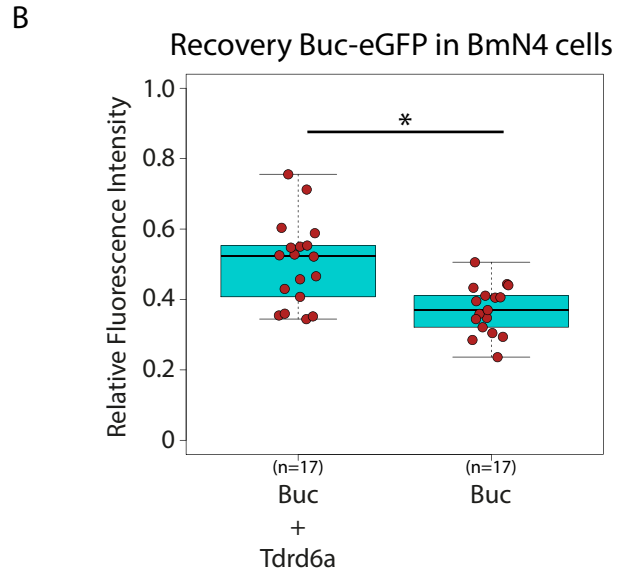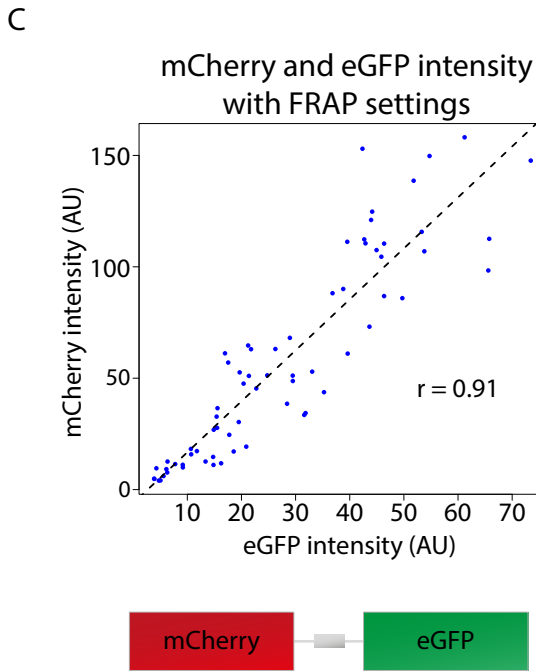

Supplemental Figure 7

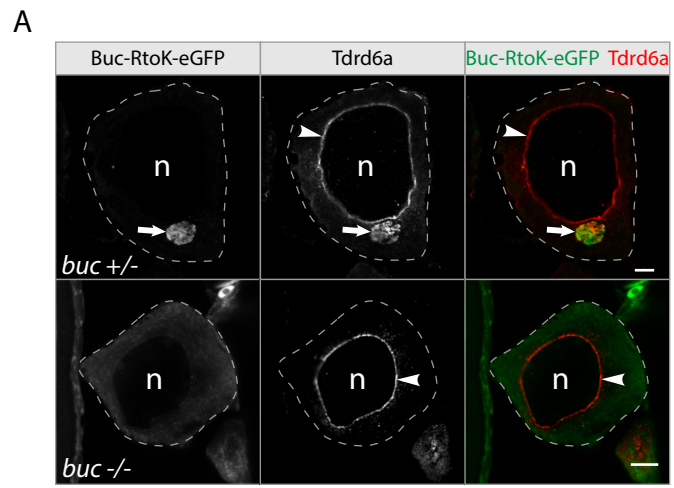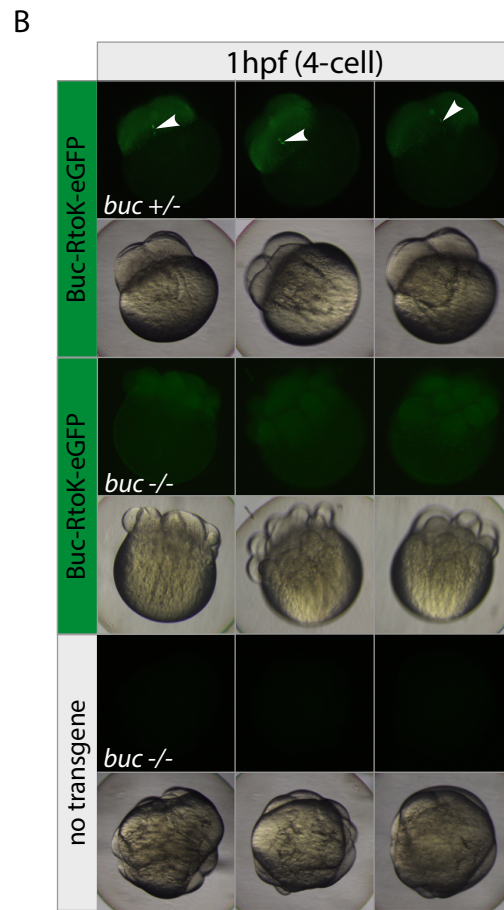



**Supplemental Figure 1, Related to Figure 1.** (A) Schematic overview of Tdrd6a. (B) RT-PCR of different tissues to confirm germline expression. (C) Tdrd6a co-localizes to Vasa-eGFP in nuage, to Buc-eGFP in the Bb (Riemer et al., 2015) and to Ziwi in the Gp. A Tdrd6a-mCherry-polyA3'UTR was used under a Ziwi promoter, which expresses until ~stage II oocytes. Scale bars (top-middle-bottom): 2 $\mu$ m, 10 $\mu$ m and 100 $\mu$ m (D) Western blot for Tdrd6a in wt and *tdrd6a*<sup>-/-</sup> ovary and testis. (E) Tdrd6a staining in wt and *tdrd6a* mutant ovary. Tdrd6a is lost from nuage in the *tdrd6a* mutant (arrowhead) but some signal from the Bb remains (arrow). Wt is taken along from Figure 1A for comparison. Scale bars indicate 10 $\mu$ m (F) Tdrd6a staining in wt and a MZ *tdrd6a* mutant 4-cell stage embryo. Arrowheads indicate the cleavage planes. Wt is taken along from Figure 1B for comparison. Scale bars indicate 100 $\mu$ m.

**Supplemental Figure 2, Related to Figure 1.** (A) Quantitative Western blot for Tdrd6a, Tdrd1 and IgG IPs (based on IRDye detection with LI-COR). Ziwi is 3.3x more present in Tdrd6a IPs compared to Tdrd1 IPs, when normalized to Zili. (B) Length distribution sRNA reads mapping to TEs for *tdrd6a*<sup>+/-</sup> and *tdrd6a*<sup>-/-</sup> ovary, as indicated. (C) 5' overlap of piRNAs in *tdrd6a*<sup>+/-</sup> and *tdrd6a*<sup>-/-</sup> ovary. Ping-pong Z-scores are 39 and 41 for *tdrd6a*<sup>+/-</sup> and *tdrd6a*<sup>-/-</sup> respectively. (D) 5' nucleotide bias displaying the typical 5'U bias in both genotypes. (E) The sense/antisense bias observed in ovary of *tdrd6a*<sup>+/-</sup> and *tdrd6a*<sup>-/-</sup> siblings is plotted for all DNA and RNA transposons. *Tdrd6a*<sup>-/-</sup> ovary shows a reduction in antisense piRNAs (p = 0.03) mapping to RNA elements. (F) Length distribution sRNA reads mapping to TEs for *tdrd6a*<sup>+/-</sup> and *tdrd6a*<sup>-/-</sup> early and late oocytes, as indicated. (G) 5' overlap of piRNAs in *tdrd6a*<sup>+/-</sup> and *tdrd6a*<sup>-/-</sup> early and late oocytes. Ping-pong Z-scores are 30 and

32 in early oocytes and 32 and 33 in late oocytes, for *tdrd6a*<sup>+/−</sup> and *tdrd6a*<sup>−/−</sup> respectively. (H) 5' nucleotide bias displaying an unaffected 5'U bias. (I,J) The sense/antisense bias observed in ovary of *tdrd6a*<sup>+/−</sup> and *tdrd6a*<sup>−/−</sup> siblings plotted for reads mapping against DNA and RNA transposons, early versus late (I) and *tdrd6a*<sup>+/−</sup> versus *tdrd6a*<sup>−/−</sup> (\* indicates p < 0.01, Mann-Whitney-Wilcoxon Test) (J) RPM = Reads per million.

**Supplemental Figure 3, Related to Figure 2.** (A) Barplot displaying the number of cells per genotype and developmental timepoint used in this study. (B and C) t-SNE maps showing transcript counts of *nanog* and the *rps* gene group, respectively. (D) Barplot displaying the significance of enrichment for the different genotype-developmental time combinations in the six clusters identified in (2B). (E) Barplot displaying the RPKM counts for six Gp mRNAs from bulk RNA-seq of 1-cell stage wt and Mmut *tdrd6a* embryos, as indicated. Error bars indicate standard deviation obtained from three biological replicates. (F) Scatterplot displaying transcript counts in wt and Mmut PGCs at 3.5hpf based on scRNA-seq. Genes highlighted in red are 2 fold up or down regulated between genotypes with a p-value < 0.01 (p-value is calculated by negative binomial statistics and corrected for multiple testing (Benjamini–Hochberg)). (G) Barplot representing the Spearman correlation between Gp-Gp transcript and BG-BG transcripts in 3.5hpf old embryos, as indicated. Standard deviations of the Gp-Gp correlations were obtained by bootstrapping. (H) Tdrd6a RIP-qPCR analysis for *nanos3*, *dazl* and *vasa*. Enrichments were calculated compared to beads only RIP and normalized to  $\beta$ -actin. Error bars represent standard deviation of two biological replicates (\* indicates p-value < 0.001, p-value obtained by two-sided Student's t-test). (I, J) Boxplots displaying the *hook2*-Gp and BG-BG correlations in 3.5hpf PGCs from wt and Mmut embryos, as indicated (\* = p-value < 0.001, n.s. = non-significant, calculated by Wilcoxon test). (K) Ziwi

RIP-qPCR analysis for *nanos3*, *dazl* and *vasa*. Enrichments were calculated compared to beads only RIP and normalized to  $\beta$ -actin. Error bars represent standard deviation of two biological replicates (\* = p-value < 0.05, p-value obtained by two-sided Student's t-test). (L) Western blot control for successful IP of (K).

**Supplemental Figure 4, Related to Figure 3.** (A, B) Additional electron micrographs to further illustrate *tdrd6a* heterozygous (A) and mutant (B) Balbiani bodies, including the Bbs from Figure 3E and F (bottom row). Overlays in the right panel indicate the Gp regions (yellow) and mitochondria (cyan) that can be appreciated in the middle panel.

**Supplemental Figure 5, Related to Figure 4.** (A) FISH against *nanos3* using anti-DIG IHC combined with Tdrd6a IHC visualizing Gp at a 4-cell stage embryo cleavage plane. (B) Maximum projections of Z-stacks of wt and Mmut Gp of 4-cell stage Buc-eGFP signals, used to calculate Gp volumes of Figure 4C. Red dotted line indicates the largest Gp fragment, of which the volume in  $\mu\text{m}^3$  was measured. Scalebars represent  $5\mu\text{m}$  (A) and  $10\mu\text{m}$  (B).

**Supplemental Figure 6, Related to Figure 6.** (A) Surface calculation of Buc-containing granules in transfected BmN4 cells in  $\mu\text{m}^2$ . Overall, granules increase in size in the presence of Tdrd6a, with large variation between co-transfected cells. (B) Boxplot of the recovery of separate FRAP experiments of Buc-eGFP as in Figure 6E, based on the average intensity value of the last 20 frames (\* indicates p-value < 0.05, calculated by Wilcoxon test). (C) Fluorescence intensity of an mCherry-eGFP fusion construct as indicated, using the FRAP settings used in Figure 6E.

**Supplemental Figure 7, Related to Figure 7.** (A) Tdrd6a localization in sections of *buc*<sup>+/-</sup> and *buc*<sup>-/-</sup> oocytes in the Buc-RtoK-eGFP background. Arrow: Bb, arrowheads: nuage. Scale bar represents 10μm (B) Examples of 4-cell stage embryos of *buc* <sup>+/-</sup> and <sup>-/-</sup> mothers, with and without Buc-RtoK-eGFP. Without the presence of wt Buc, Buc-RtoK can rescue the lack of polarity of the *buc* phenotype (*buc* <sup>-/-</sup>, no transgene), even though most embryos display severe developmental defects (*buc* <sup>-/-</sup>, Buc-RtoK-eGFP). Arrowheads: Gp.
